# Supplementary material for: Novel carbon sphere@Bi2MoO6core–shell structure for efficient visible light photocatalysis
Source: Royal Society of Chemistry journal article supplement (doi:10.1039/c4ra16777e), 2015-01-01
Supplement: c4ra16777e1.pdf [file c4ra16777e1.pdf]

## Novel carbon sphere@Bi<sub>2</sub>MoO<sub>6</sub> core-shell structure for efficient visible light photocatalysis

Jinliang Li,<sup>a</sup> Xinjuan Liu<sup>\*b</sup>, Xianqing Piao,<sup>a</sup> Zhuo Sun<sup>a</sup> and Likun Pan,<sup>\*a</sup>

<sup>a</sup> Engineering Research Center for Nanophotonics & Advanced Instrument, Ministry of Education, Shanghai Key Laboratory of Magnetic Resonance, Department of Physics, Department of Physics, East China Normal University, Shanghai 200062, China, Fax: +86 21 62234321; Tel: +86 21 62234132; E-mail:

lkpan@phy.ecnu.edu.cn

<sup>b</sup> Center for Coordination Bond and Electronic Engineering, College of Materials Science and Engineering, China Jiliang University, Hangzhou 310018, China; E-mail: lxj669635@126.com

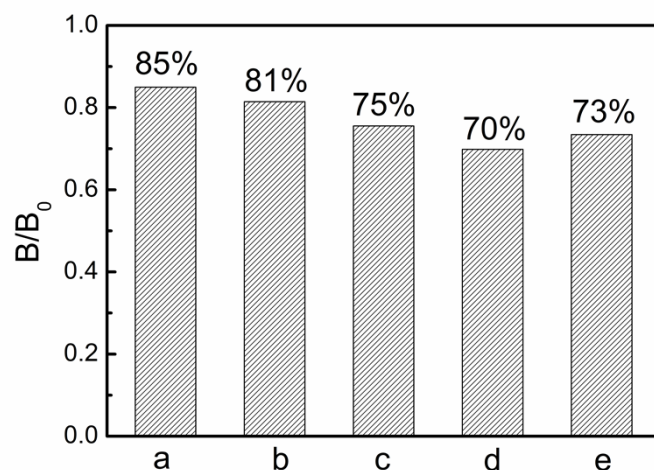

**Fig. S1** Bar plot showing the remaining RhB in the solution after reaching the adsorption equilibrium in the dark by using (a) Bi<sub>2</sub>MoO<sub>6</sub>, (b) CS@BMO-2, (c) CS@BMO-5, (d) CS@BMO-7, (e) CS-BMO.

Fig. S1 shows the result of RhB adsorption experiments. The normalized temporal concentration changes ( $B/B_0$ ) of RhB during the adsorption process are proportional to the normalized maximum absorbance ( $A/A_0$ ), which can be derived from the change in the RhB absorption profile during the adsorption process.
